# Supplementary material for: Rational Discovery of Antimicrobial Peptides by Means of Artificial Intelligence
Source: MDPI journal article supplement (doi:10.3390/membranes12070708), 2022-07-14
Supplement: s1 [file s1]

## Supplementary Material for Rational discovery of antimicrobial peptides by means of artificial intelligence

**Table S1.** Physicochemical properties of AHB-1. Values for each selection criteria utilized to select the most promising candidates.

| Sequence     | Size | Net Charge | Boman Index | Hydrophobic Ratio | Hydrophobic Moment | Aliphatic Index | Instability Index | Isoelectric Point |
|--------------|------|------------|-------------|-------------------|--------------------|-----------------|-------------------|-------------------|
| MFVFLVLLPLVS | 12   | -0.01      | -3.059      | 0.833             | 0.109              | 202.5           | 25.216            | 6.0               |

**Table S2.** Antimicrobial assay. MIC values for AHB-1 peptide in Na<sub>2</sub>PHO<sub>4</sub> buffer for Gram-negative *E. coli* and Gram-positive *S. aureus*.

| Sequence     | MIC(μM)        |                  |
|--------------|----------------|------------------|
|              | <i>E. coli</i> | <i>S. aureus</i> |
| MFVFLVLLPLVS | > 250          | > 250            |

Following Table S1 we can see that AHB-1 fulfills multiple of the selection criteria for AM peptides; however, AMPs-Net was able to predict it as a non-AMP accurately. A MIC assay corroborated its bioactivity. AHB-1 has no bactericidal nor bacteriostatic activity toward *E. coli* or *S. aureus*. No growth inhibition was observed even at the highest evaluated peptide concentration.
